# Supplementary figures and images for: Effect of losartan and spironolactone on triglyceride-rich lipoproteins in diabetic nephropathy
Source: PubMed Central journal article supplement — J Investig Med. 2016 Jul 7;64(6):1102–8. doi: 10.1136/jim-2016-000102 (PMC4975815; doi:10.1136/jim-2016-000102), 2016-07-07

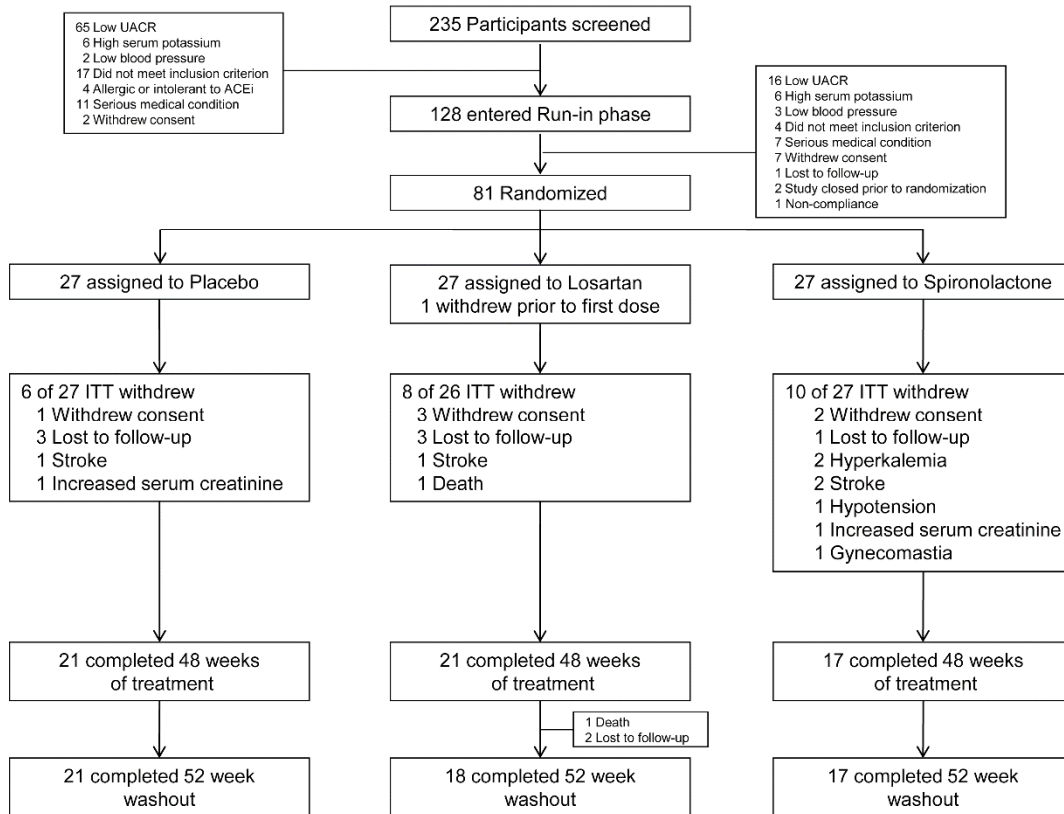

Supplement: jim-2016-000102supp_figure.pdf [file jim-2016-000102supp_figure.pdf]
